# Supplementary material for: Ultra-Thin Wrinkled Carbon Sheet as an Anode Material of High-Power-Density Potassium-Ion Batteries
Source: MDPI journal article supplement (doi:10.3390/molecules27092973), 2022-05-06
Supplement: s1 [file s1]

## Supporting information

# Ultra-Thin Wrinkled Carbon Sheet as an Anode Material of High-Power-Density Potassium-Ion Batteries

Boshi Cheng <sup>1,2</sup>, Xing Li <sup>1,2,\*</sup>, Linhai Pan <sup>2</sup>, Hongqiang Xu <sup>2</sup>, Haojie Duan <sup>2</sup>, Qian Wu <sup>2</sup>, Bo Yin <sup>2,\*</sup> and Haiyong He <sup>2</sup>

<sup>1</sup> School of Materials Science and Chemical Engineering, Ningbo University, Ningbo 315211, China; chengboshi@nimte.ac.cn

<sup>2</sup> Ningbo Institute of Materials Technology and Engineering, Chinese Academy of Sciences, Ningbo 315201, China; panlinhai@nimte.ac.cn (L.P.); xuhongqiang@nimte.ac.cn (H.X.); duanhaojie@nimte.ac.cn (H.D.); wuqian20@nimte.ac.cn (Q.W.); hehaiyong@nimte.ac.cn (H.H.)

\* Correspondence: lixing@nbu.edu.cn (X.L.); yinbo@nimte.ac.cn (B.Y.)

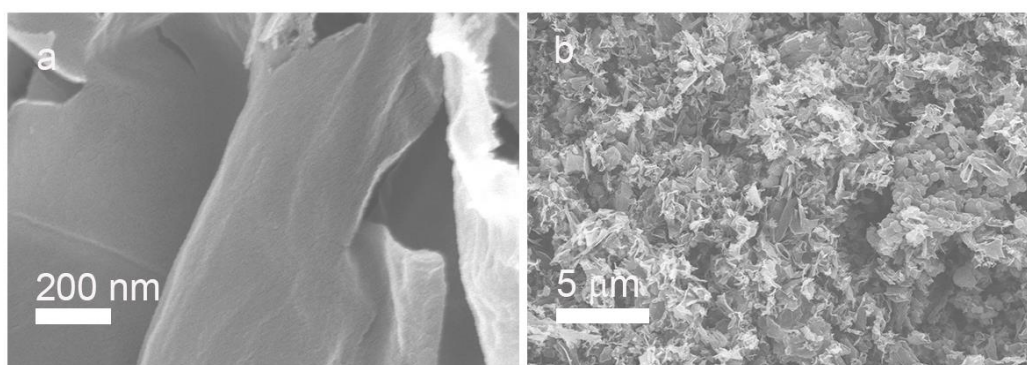

Figure S1. SEM images of USC<sub>10-1</sub>.

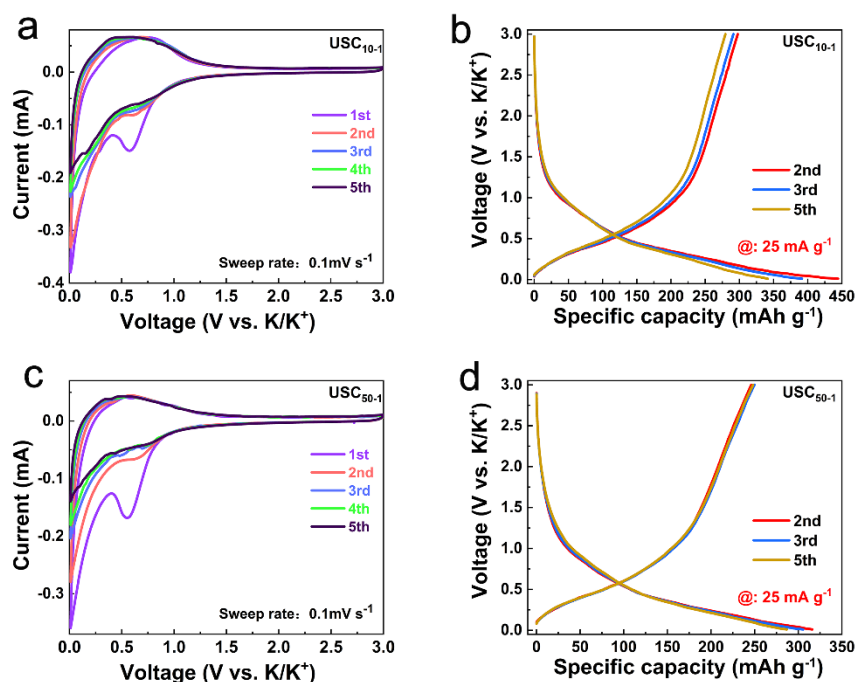

Figure S2. The CV curves at 0.1 mV s<sup>-1</sup> scanning speed and charge-discharge curves at 25 mA g<sup>-1</sup>: (a,b) USC<sub>10-1</sub>, (c,d) USC<sub>50-1</sub>.

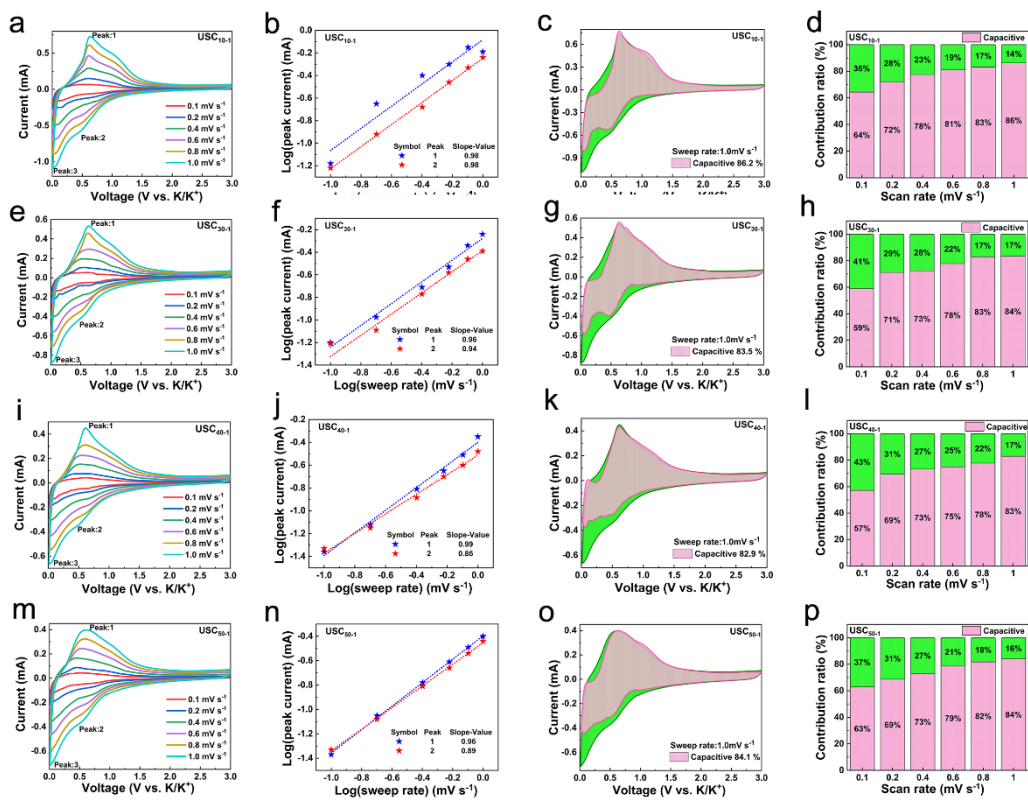

**Figure S3.** (a, e, i, m) CV curves at different scan rates, (b, f, j, n) linear fitting relationship between log  $i$  and log  $v$  at different redox peaks, (c, g, k, o) CV curves of electrode capacitance contributions at a scan rate of 1.0 mV s<sup>-1</sup>, (d, h, l, p) contribution ratio of pseudocapacitive response at different scan rates.
